GOPAL KRISHNA, M.D.  
*Professor*

JOHN EMHARDT, M.D.  
*Assistant Professor*  
*Department of Anesthesia*  
*Indiana University School of Medicine*  
*Indianapolis, Indiana 46202-5200*

REFERENCES

1. Rao CC, McNiece WL, Emhardt J, Krishna G, Westcott R: Modification of an anesthesia machine for use during magnetic resonance imaging (letter). *ANESTHESIOLOGY* 68:640-641, 1988
2. Rao CC, Brandl R, Mashak JN: Modification of Ohmeda® Excel 210 anesthesia machine for use during magnetic resonance imaging (abstract). *ANESTHESIOLOGY* 71:A365, 1989

Neither the authors nor Indiana University has any proprietary interest in the product described in this letter.

(Accepted for publication August 10, 1990.)

Anesthesiology  
73:1055, 1990

### Wearing of Gloves by Anesthesia Personnel

*To the Editor:*—Anesthesia personnel are urged to wear rubber gloves while involved in patient care. There are at least two ways in which the wearing of rubber gloves is detrimental.

First, the skin of the hands becomes soft, macerated, and vulnerable when rubber gloves are worn continuously for many hours. It is well known that rubber gloves develop holes through which contaminants enter; therefore, the sense of security afforded by wearing gloves may be false.

Second, if anesthesia personnel are not wearing gloves and come into contact with secretions or blood, they quickly wash their hands. However, while worn, soiled gloves may come into contact with the pen, ear piece, stethoscope, papers, charts, anesthesia equipment, and other objects. Anyone, including nongloved anesthesia personnel, who touches any of these objects is therefore exposed to the contamination. Many people, for instance, put pens in their mouths.

Therefore, when gloves are worn, they should be removed and discarded as soon as the contact with blood or secretions has ended (after intubation). Clean gloves can be put on whenever such contacts are to recur. In the interim and for long periods, anesthesia personnel can and should be ungloved so that skin does not become macerated.

JAY J. JACOBY, M.D., PH.D.  
*Professor of Anesthesiology*  
*Department of Anesthesiology*  
*The Ohio State University Hospitals*  
*410 West 10th Avenue, N-429*  
*Columbus, Ohio 43210-1228*

(Accepted for publication August 14, 1990.)

Anesthesiology  
73:1055-1056, 1990

### Intravenous General Anesthesia Is Not Intravenous Sedation

*To the Editor:*—We write with concern about the article by Furman and Smith<sup>1</sup> describing "intravenous sedation" for repair of giant inguinal hernias in a ventilator-dependent premature infant. The authors conclude that by using "caudal anesthesia with iv sedation," they circumvented the use of halogenated agents and minimized pulmonary barotrauma and cardiovascular depression. At the time of the infant's preoperative evaluation, his respirations were assisted with an infant pressure-cycled ventilator set at 36 breaths per min. An additional 16 breaths per min of spontaneous ventilation gave him a total of 52 breaths per min. "Intravenous sedation" with 3.5 mg/kg ketamine plus 0.14 mg/kg midazolam was followed by caudal blockade with 1.1 ml/kg 0.25% bupivacaine containing 5 µg/ml epinephrine. Prior to incision, an additional 3.5 mg/kg iv ketamine was administered. Before completion of the hernia repair, both an additional dose of caudal bupivacaine and yet another 3.5 mg/kg iv ketamine plus 0.14 mg/kg midazolam was given. Thus, for the completion of a 3-h hernia repair, the patient received a total of 10.5 mg/kg iv ketamine, plus 0.28 mg/kg iv midazolam, in addition to continuous caudal anesthesia.

The anesthetic described above hardly constitutes iv sedation as an adjunct to caudal anesthesia, but rather suggests iv general anesthesia as an adjunct to a caudal block. No mention is made of the patient's

spontaneous respiratory effort after the initiation of iv anesthesia, yet the authors conclude that by avoiding halogenated agents, opioids, and muscle relaxants, they prevented the need for controlled ventilation intraoperatively. It is likely that the patient was fully anesthetized with iv ketamine<sup>2</sup> and midazolam and that most of his muscles distal to his midthorax were relaxed due to the caudal block. In this situation, intermittent mechanical ventilation at 36 breaths per min should be more efficient and might even improve his blood gases, even in the absence of spontaneous breathing. The authors further point out that no increases in mechanical ventilation were necessary, thereby reducing the risk for pneumothorax, but offer no evidence by way of capillary or arterial blood gas analysis to support the efficacy of their choice. It is likely that the elimination of the 16 spontaneous breaths per min, with some combination of fentanyl, an inhalation agent, and a neuromuscular blocking agent with a local anesthetic block for postoperative pain relief, would not have altered this patient's ventilator course at all, and that recovery probably would have been swift and complete. Our assumption would be that decreases, and not increases, in the need for mechanical ventilation may have been the rule in this patient if he was sedated and given neuromuscular blockade.

It is our contention that this infant received an iv general anesthetic,
